# Supplementary material for: Species Diversity and Entomological Inoculation Rate of Anophelines Mosquitoes in an Epidemic Prone Areas of Bure District, Northwestern Ethiopia
Source: Research Square preprint supplement (doi:10.21203/rs.3.rs-103609/v1), 2020-11-12
Supplement: Supplementary file 1 [file 9129bb48dff7df44b0971adb.docx]

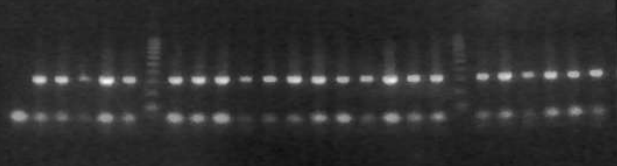


**1 2 3 4 5 6 7 8 9 10 11 12 13 14 15 16 17 18 19 20 21 22 23 24 25 26**

**Appendix 1a**: PCR identification of *An. gambiae* complex*,* Lane/L/ (7 & 20) = ladder (1000bp), the band of each ladder = 100bp; L1 = negative control; L2 = positive control (lab reared *An. arabiensis*); L3-6, 8-12 and 21- 26 = *An. arabiensis.* Gel condition = 2% agarosel gel with Etbr.


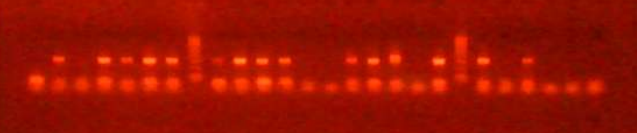


**1 2 3 4 5 6 7 8 9 10 11 12 13 14 15 16 17 18 19 20 21 22 23 24 25 26**

**Appendix 1b:** PCR identification of *An. gambiae* complex*,* Lane/L/ (8 & 20) = ladder (1000bp), the band of each ladder = 100bp; L1 = negative control; L2 = positive control (lab reared *An. arabiensis*); L3, 13,14,18,22, 24 -26 = Unamplified; L4-7, 9-12, 15-17, 19, 21, 23 = *An. arabiensis.* Gel condition = 2% agarosel gel with Etbr.
